# Supplementary material for: Design and Mechanical Properties Analysis of Variable Buffer-Force Planing Energy-Absorbing Device for Rail Vehicles
Source: MDPI journal article supplement (doi:10.3390/app13031596), 2023-01-26
Supplement: s1 [file s1]

## Appendix A:

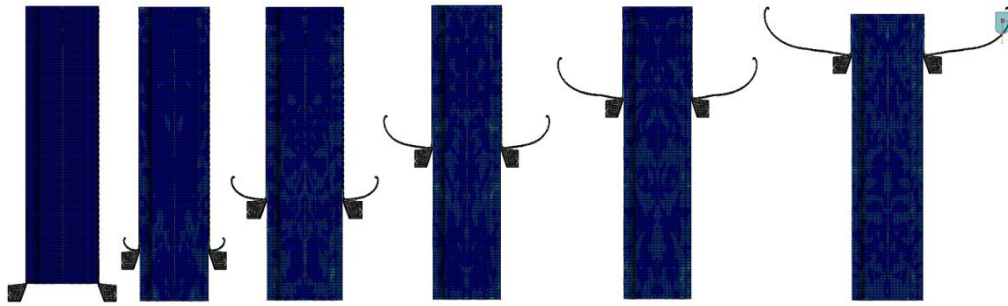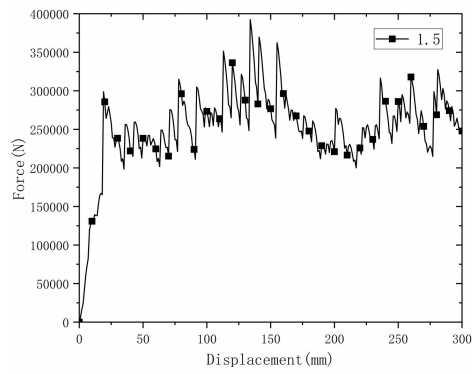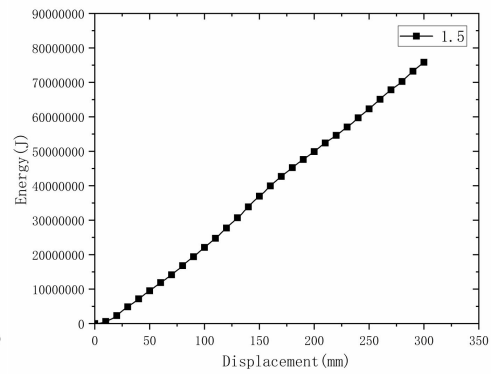

A.NO. 1.5

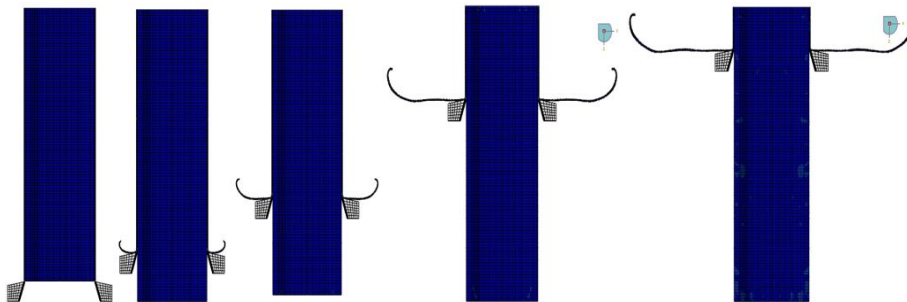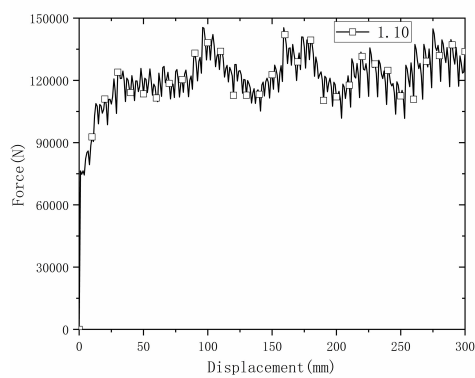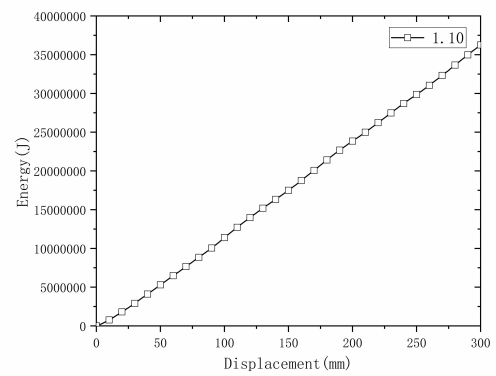

B.NO. 1.10

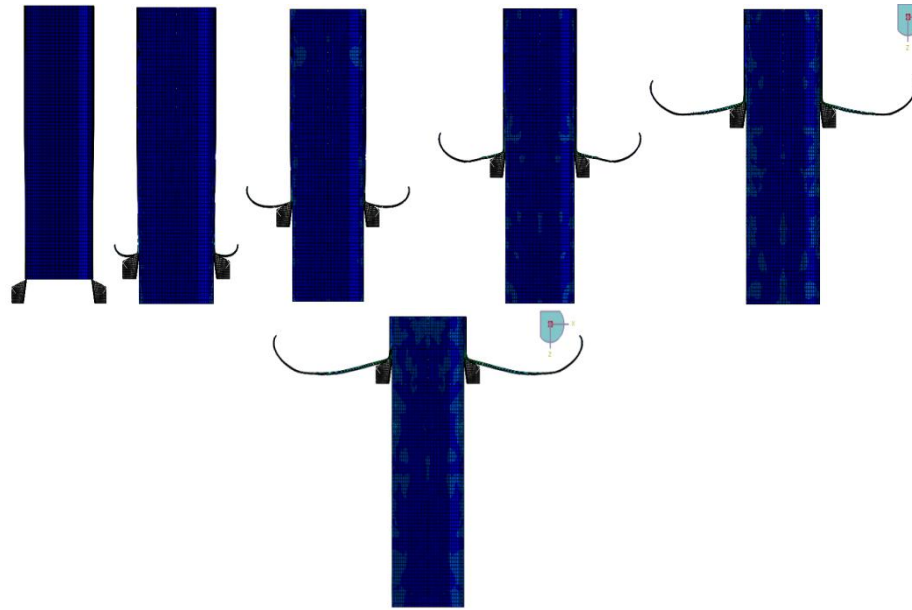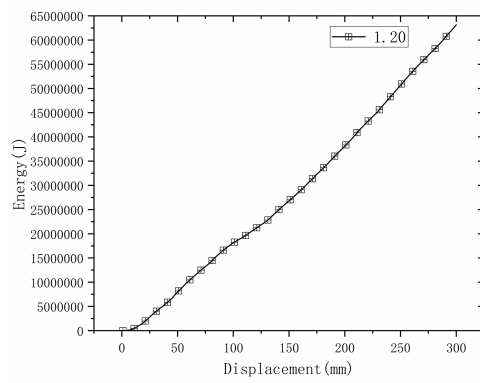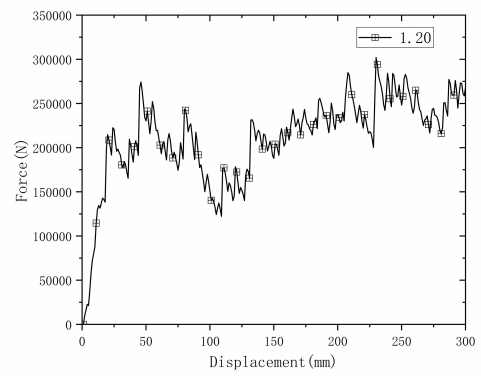

C. NO.1.20

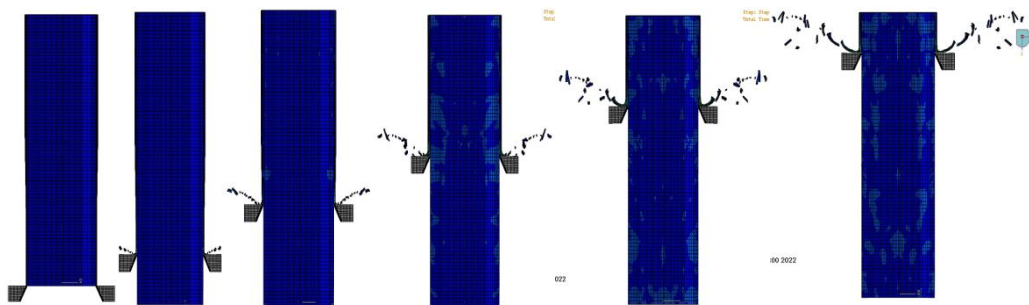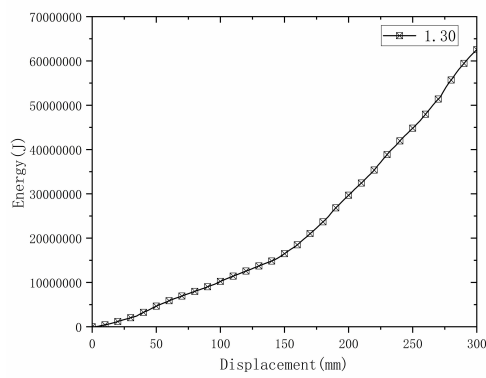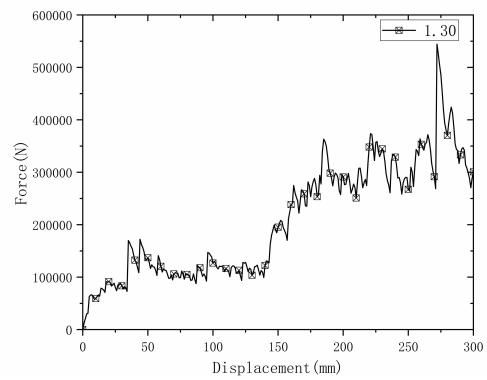

D. NO.1.30

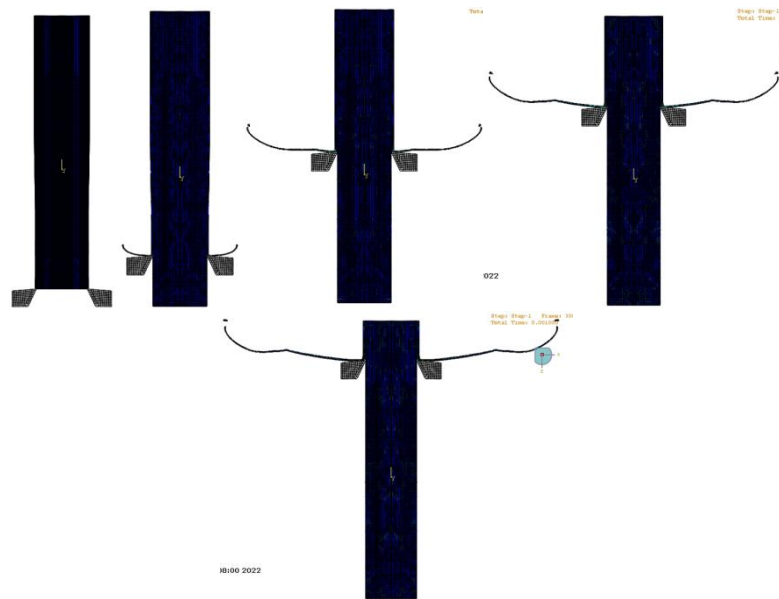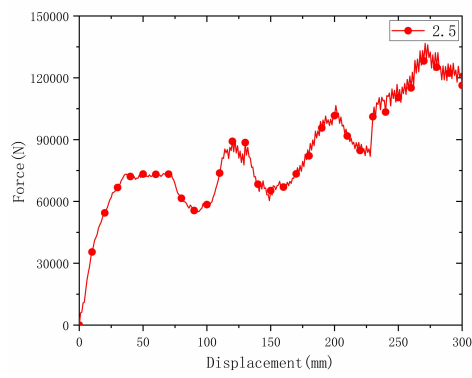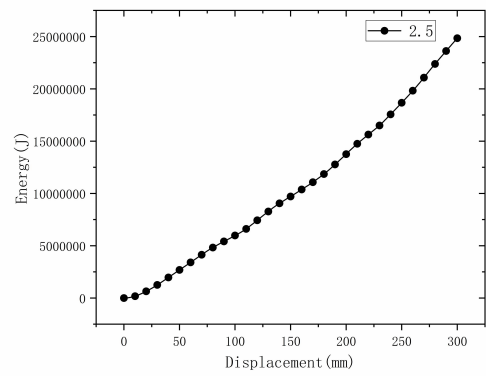

E. NO. 2.5

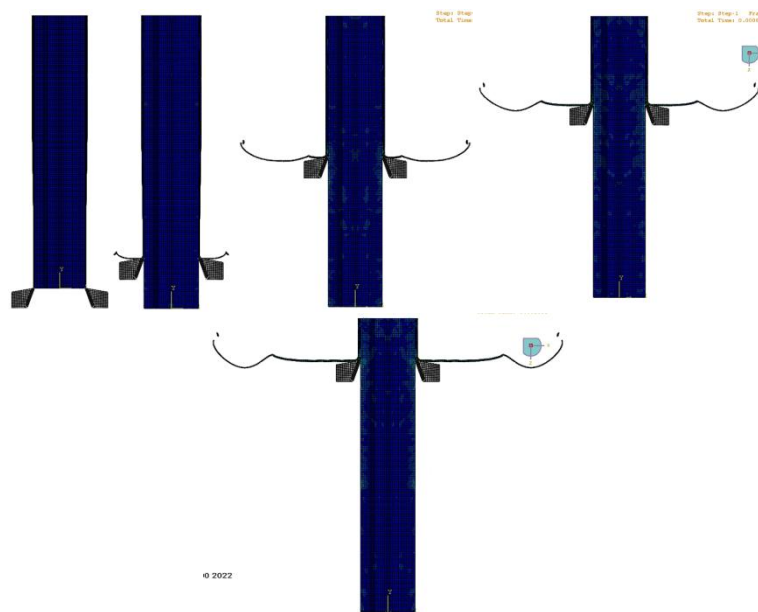

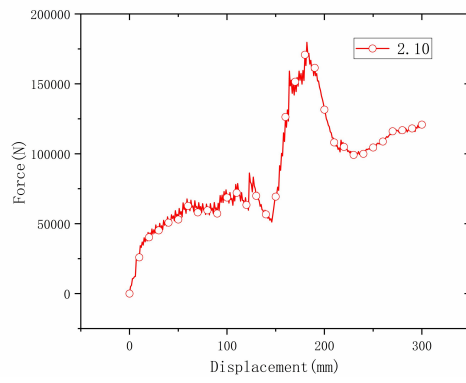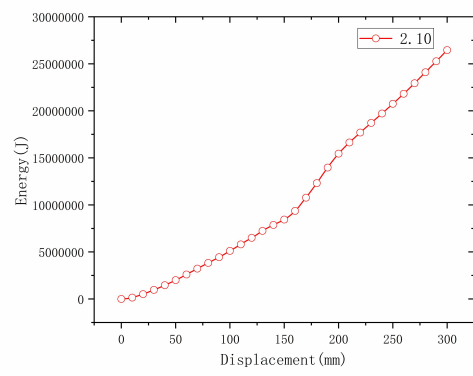

F. NO.2.10

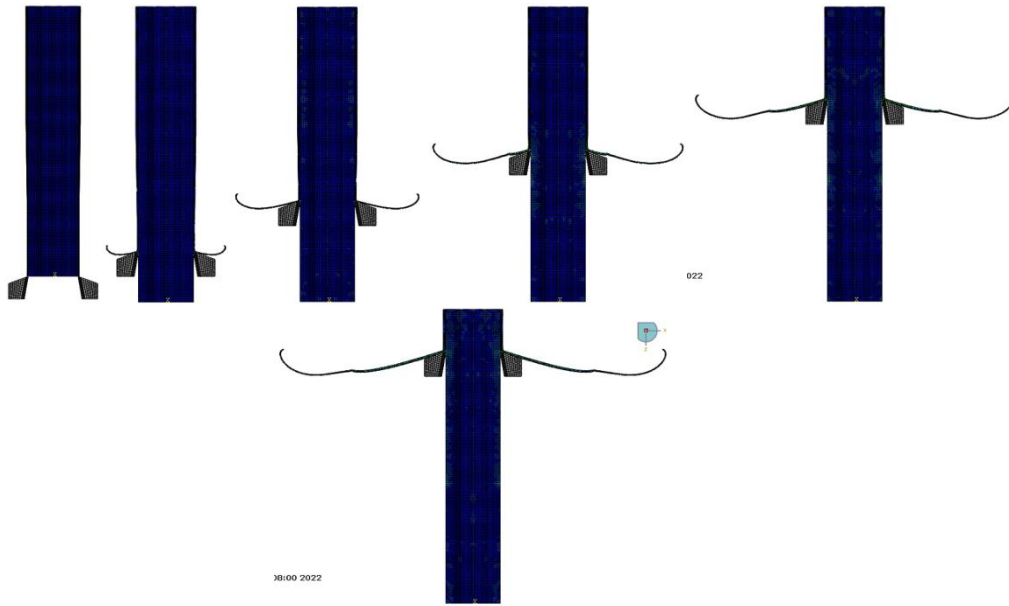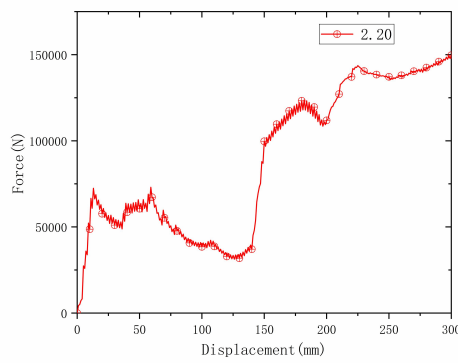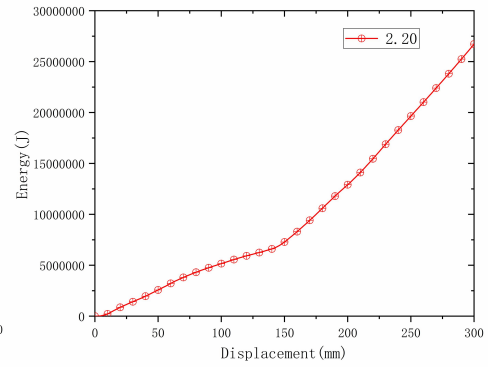

G. NO.2.20

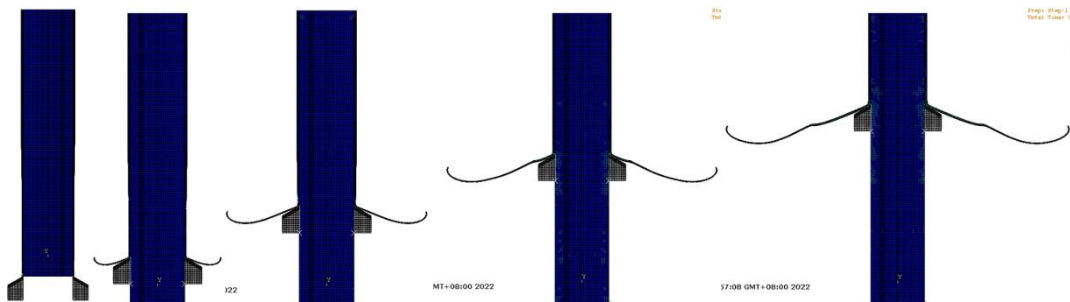



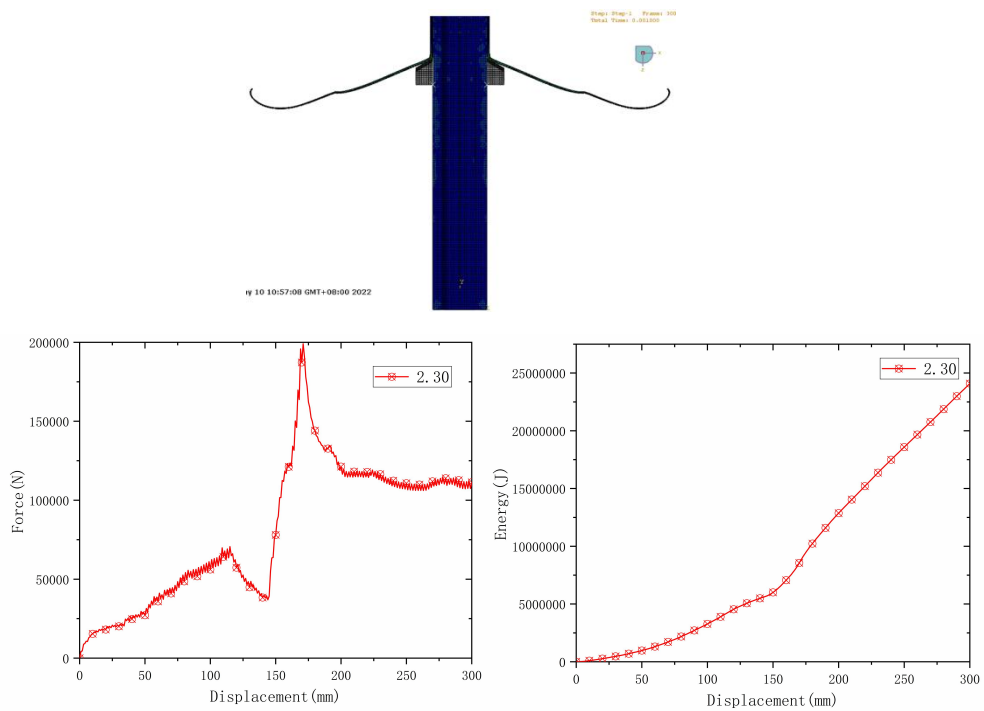

H. NO.2.30

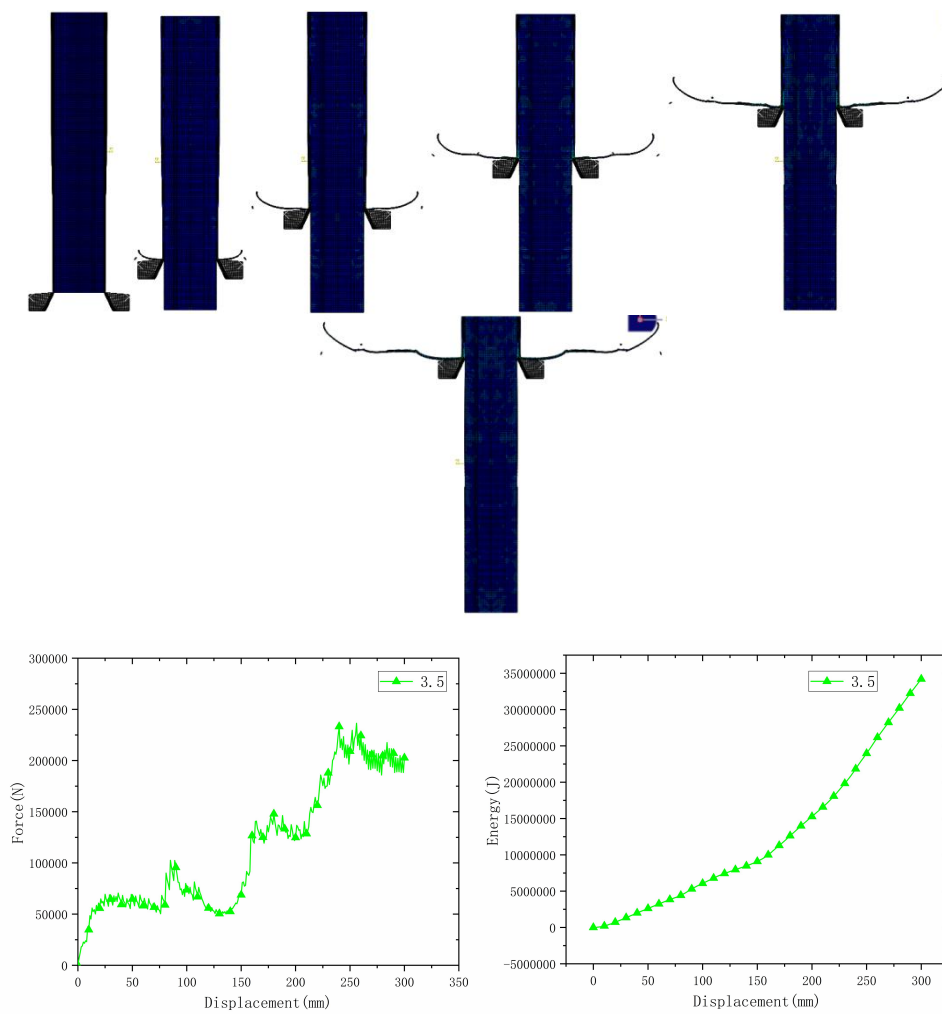

I. NO.3.5

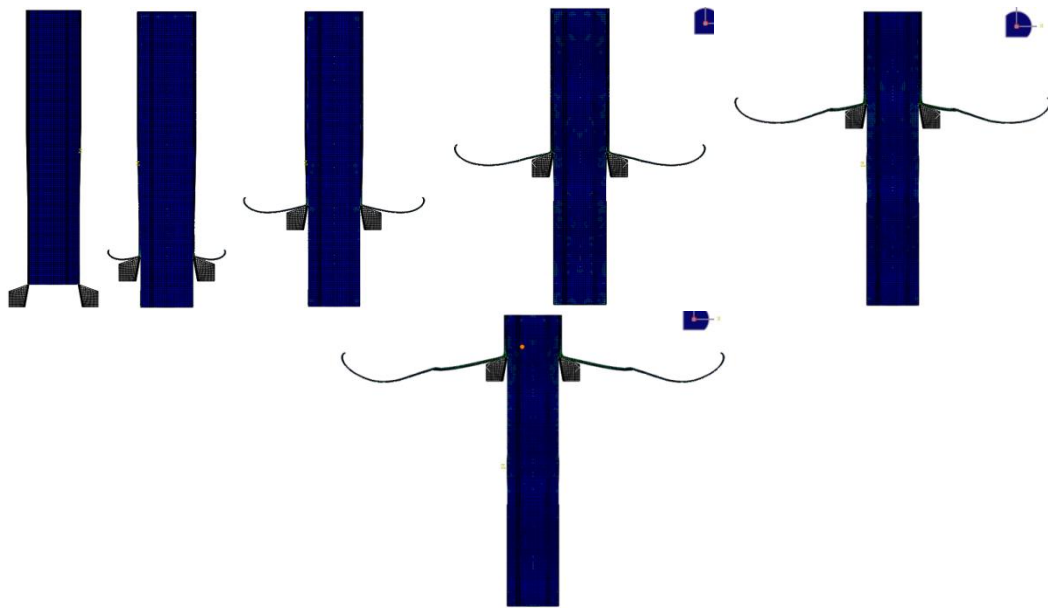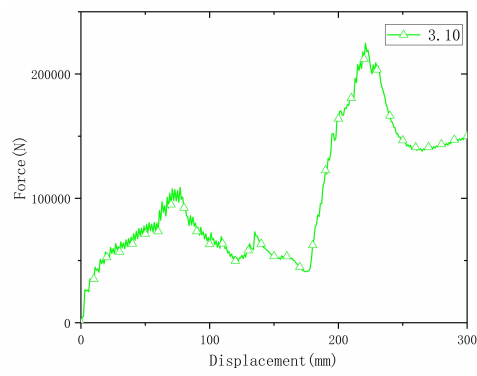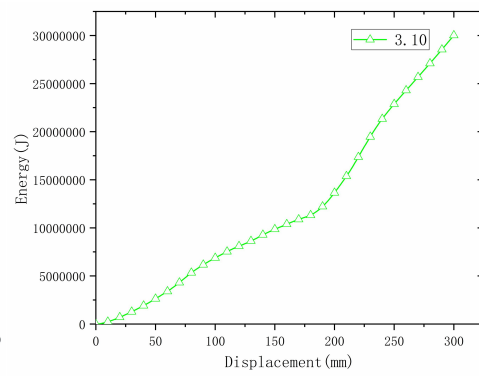

J. NO.3.10

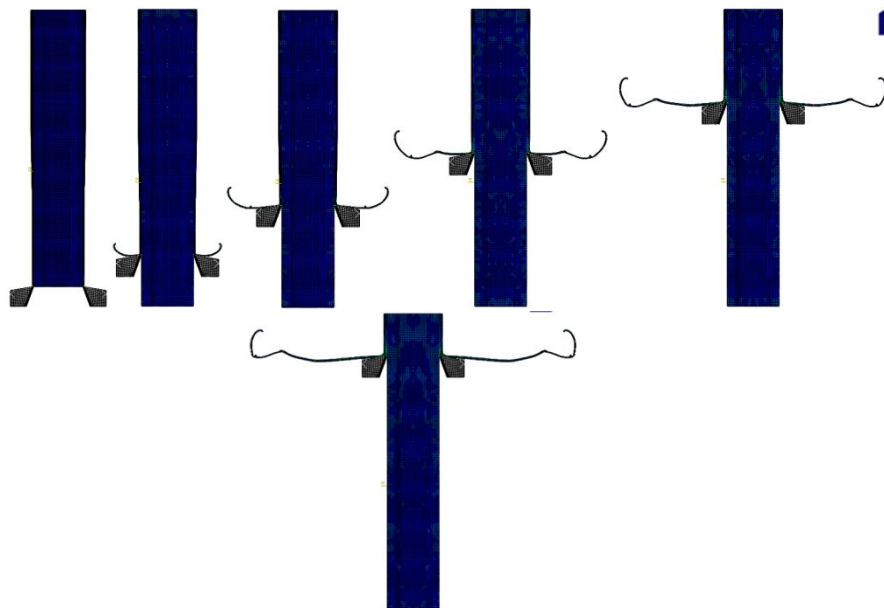

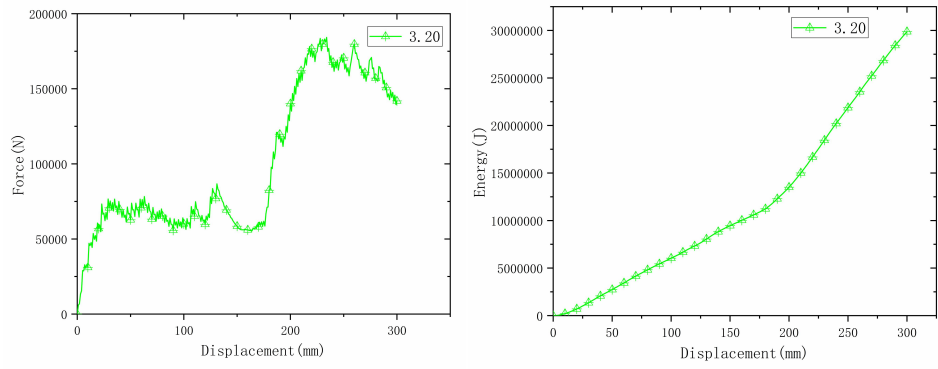

K. NO. 3.20

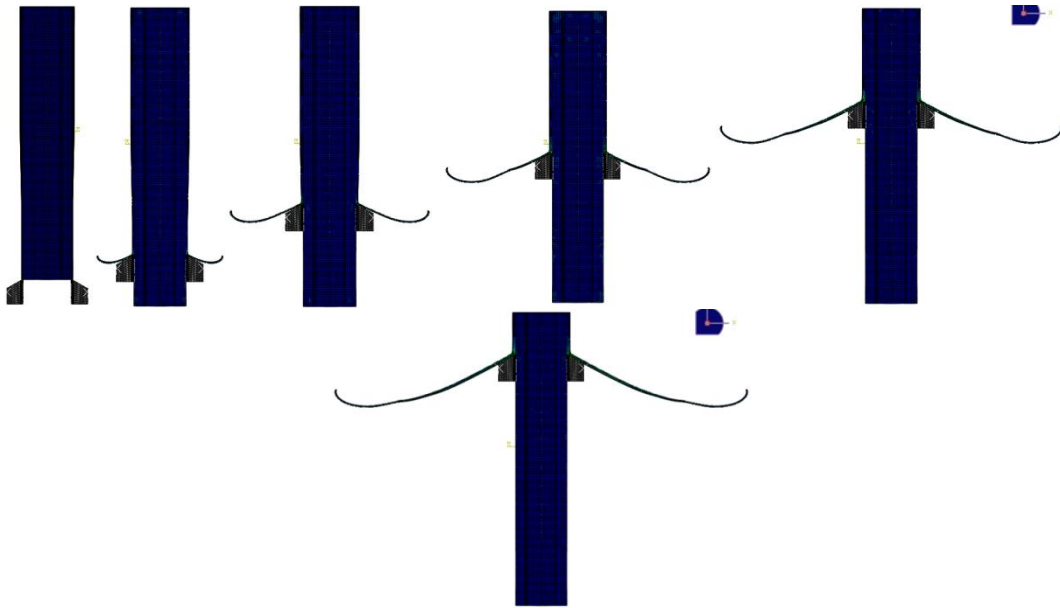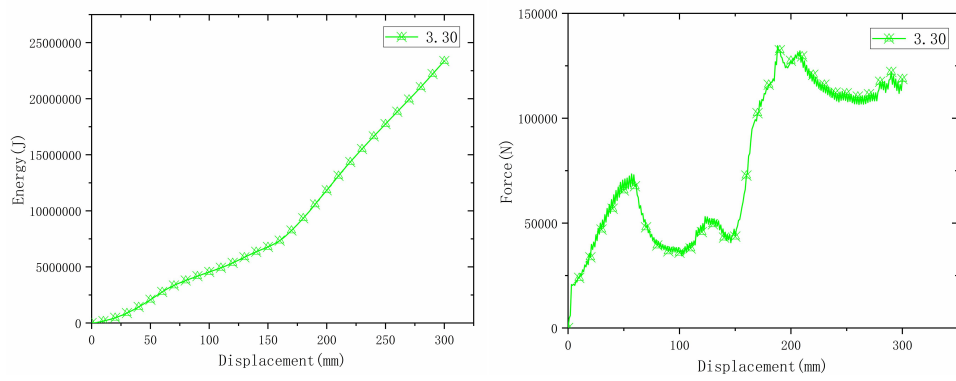

L. NO.3.30

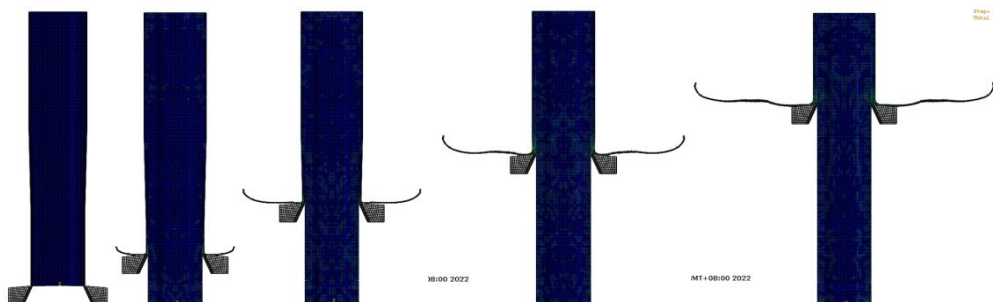

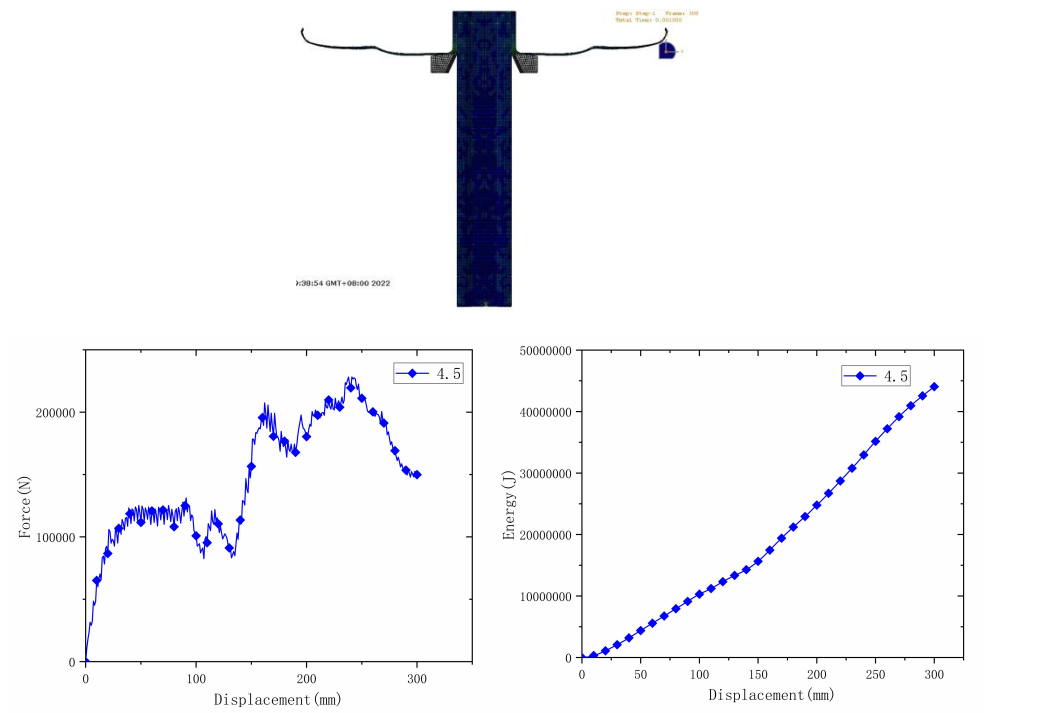

M. NO.4.5

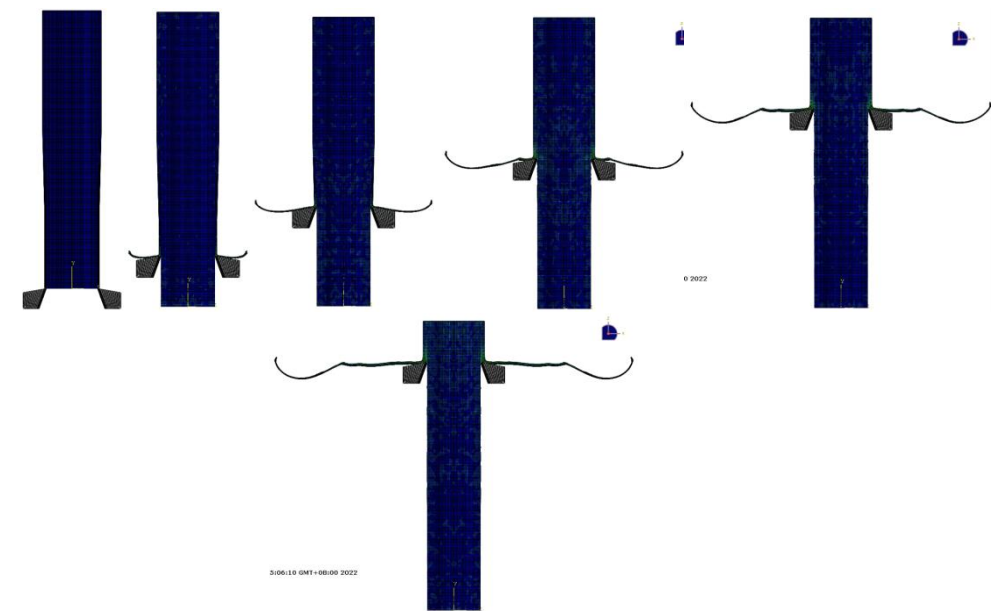

N. NO.4.10

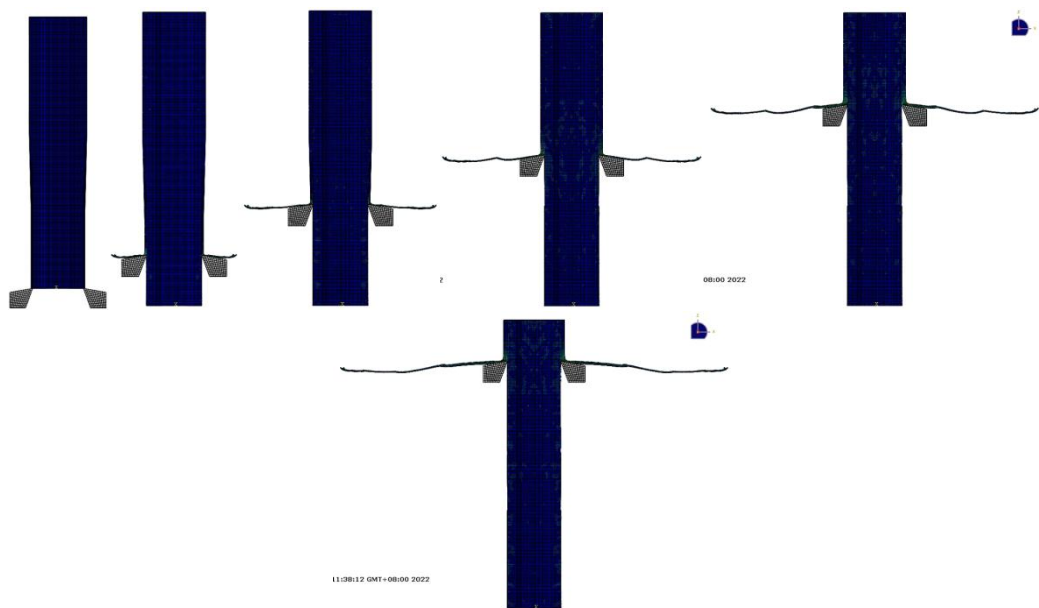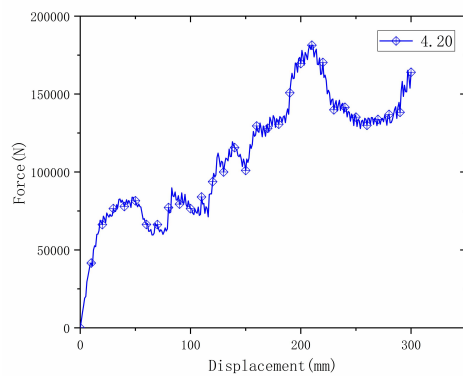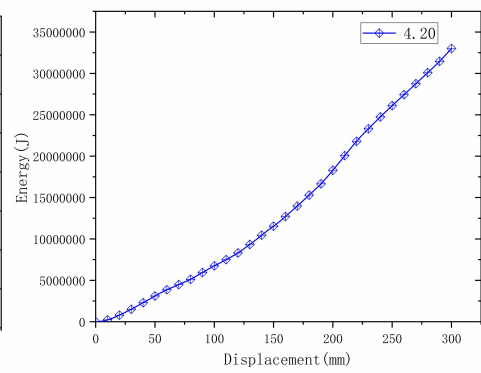

O. NO.4.20

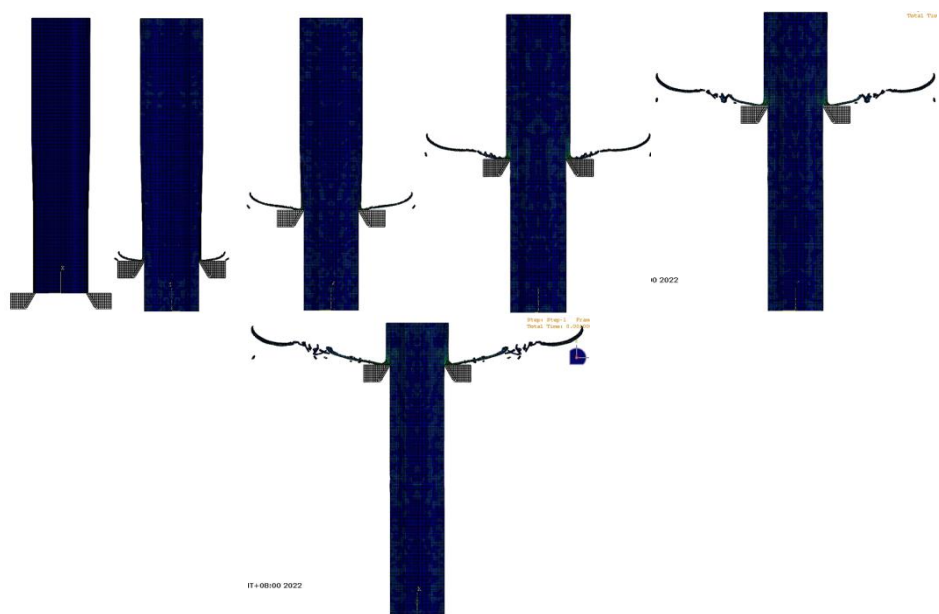

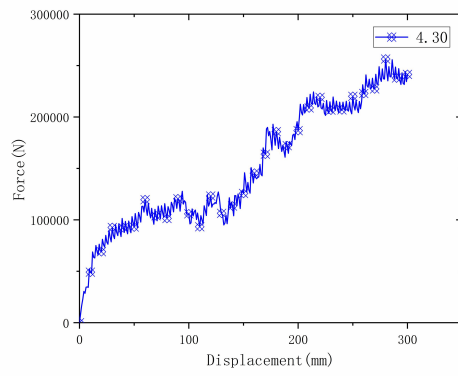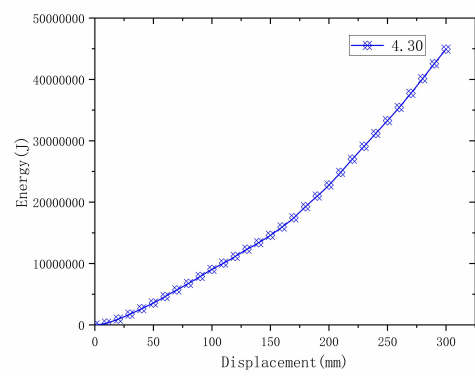

P. NO.4.30

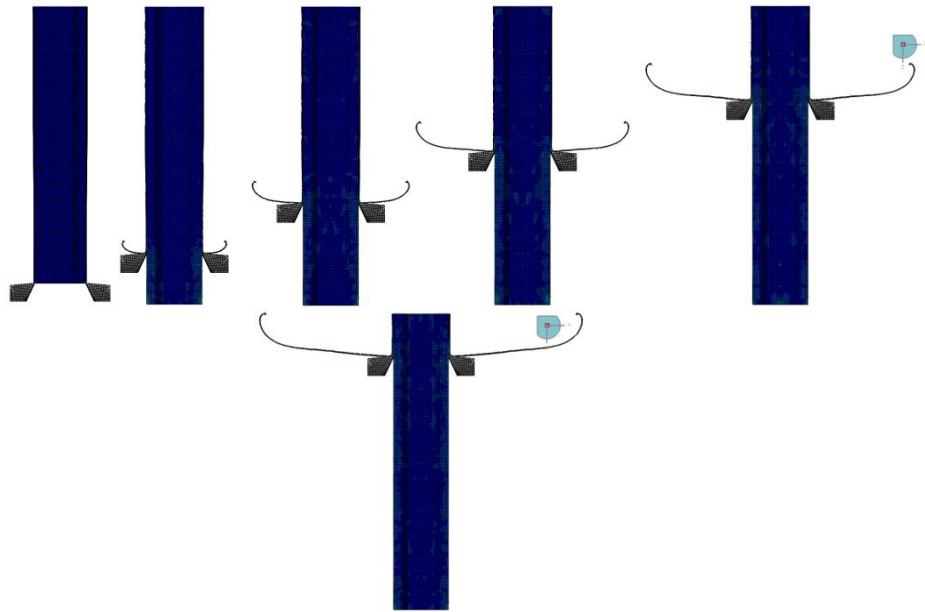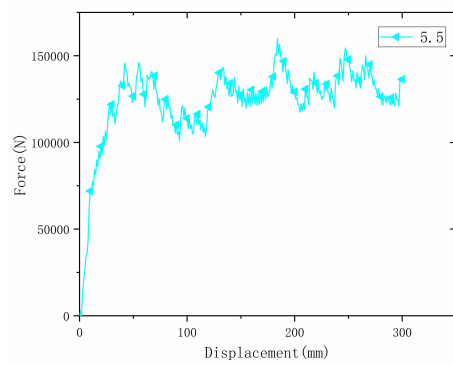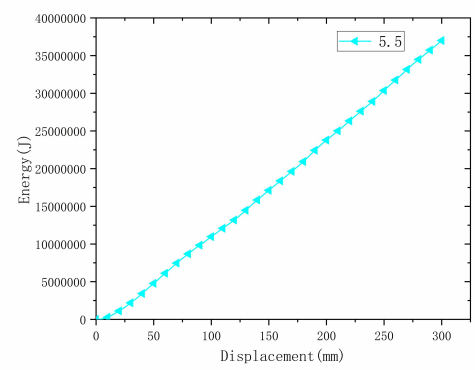

Q. NO.5.5

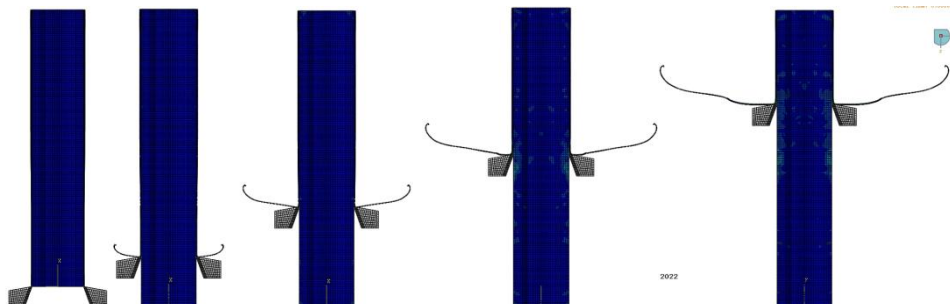

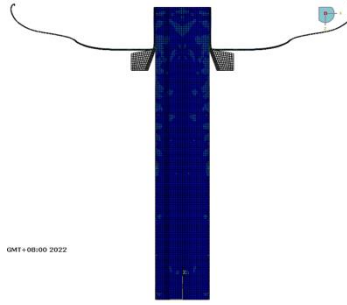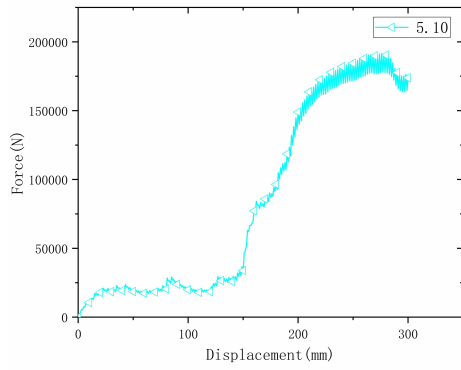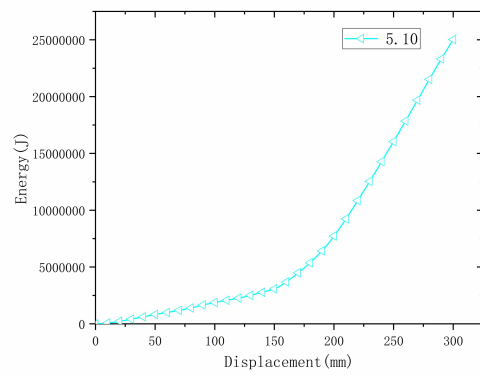

R.NO.5.10

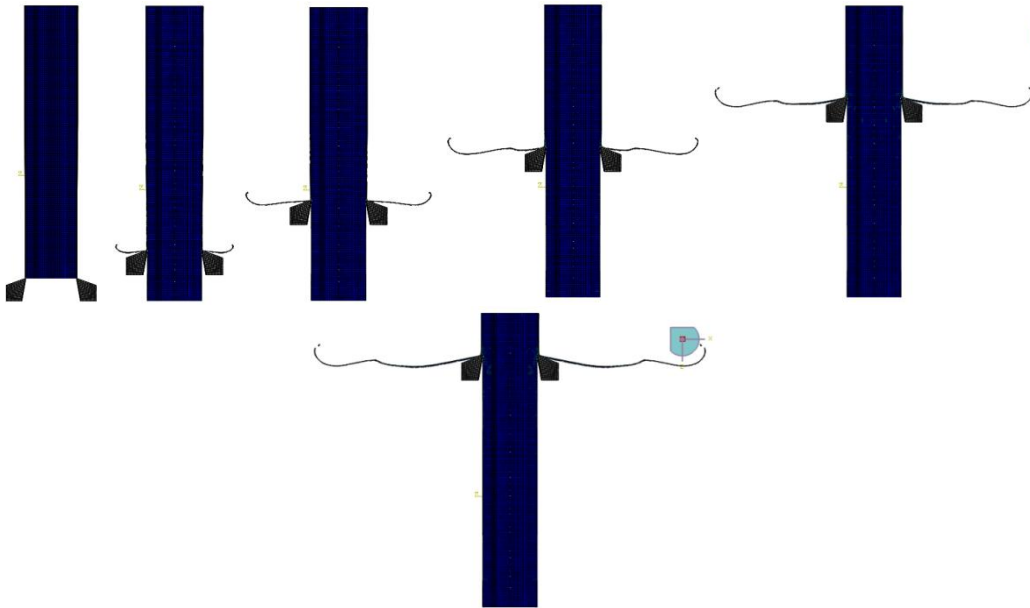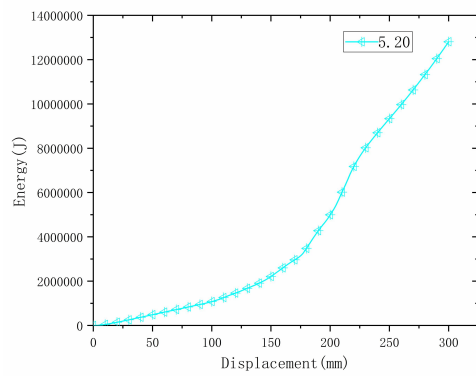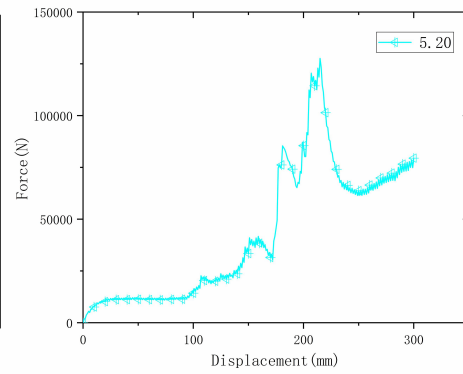

S. NO. 5.20



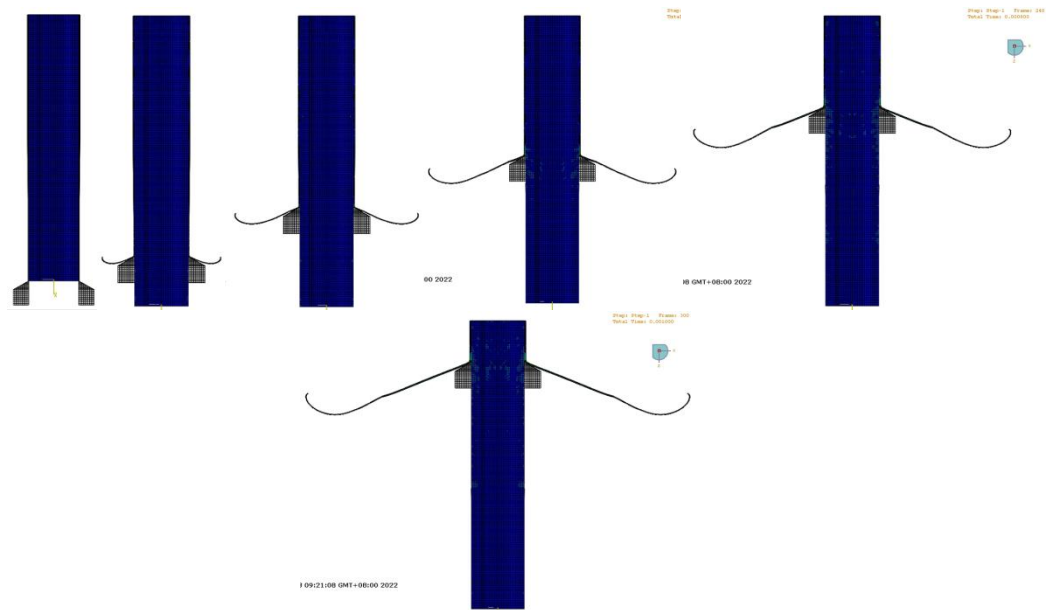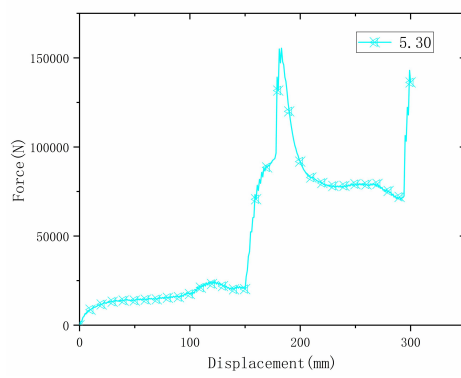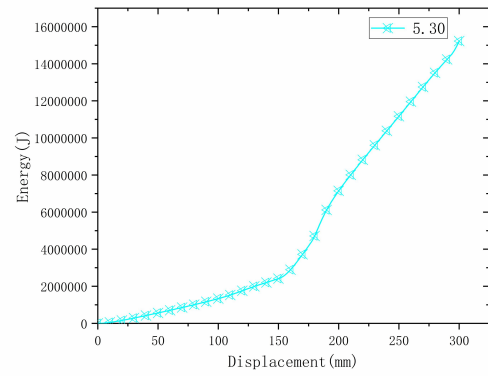

T. NO.5.30

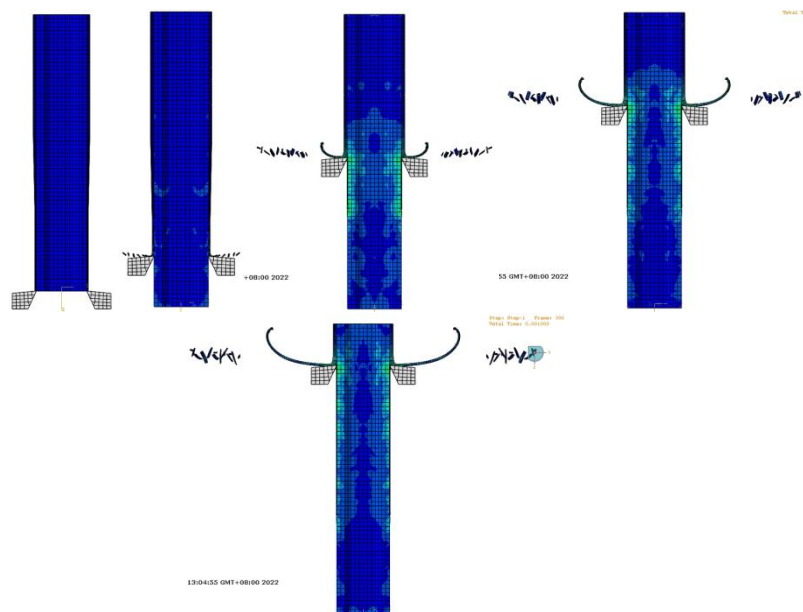

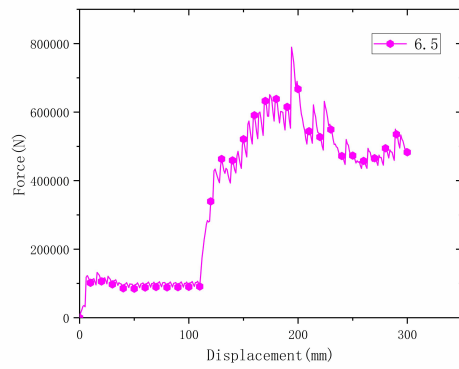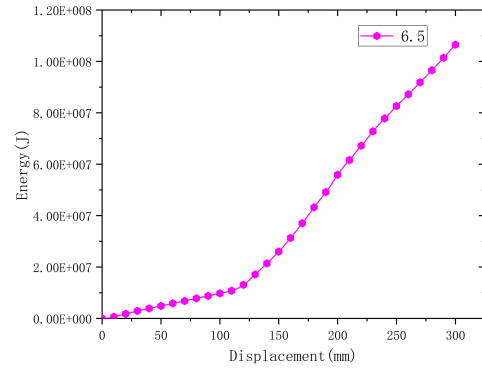

U. NO.6.5

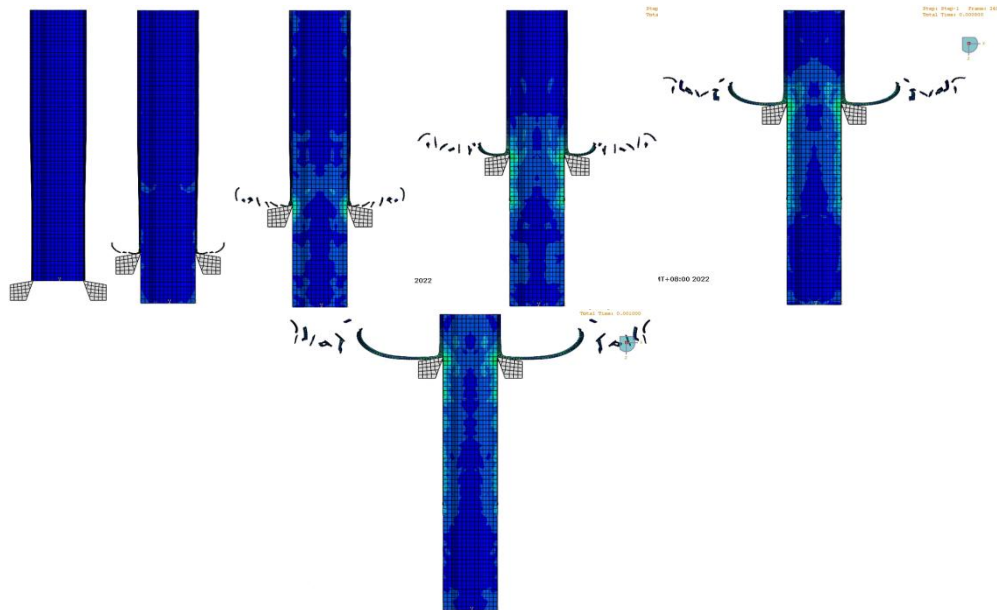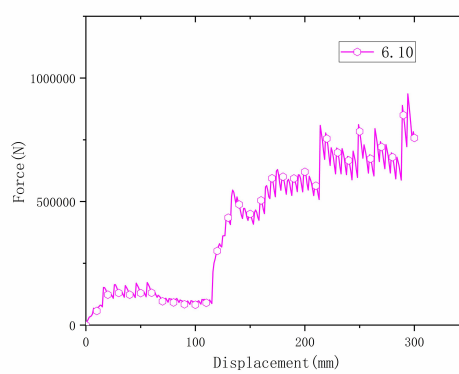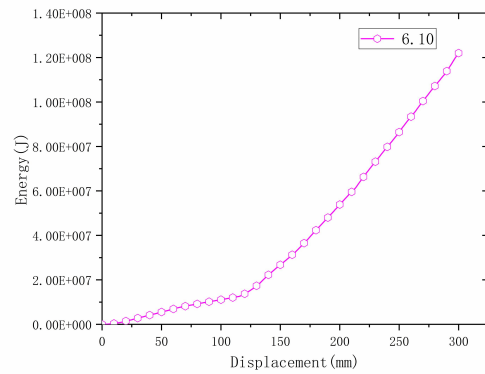

V. NO. 6.10

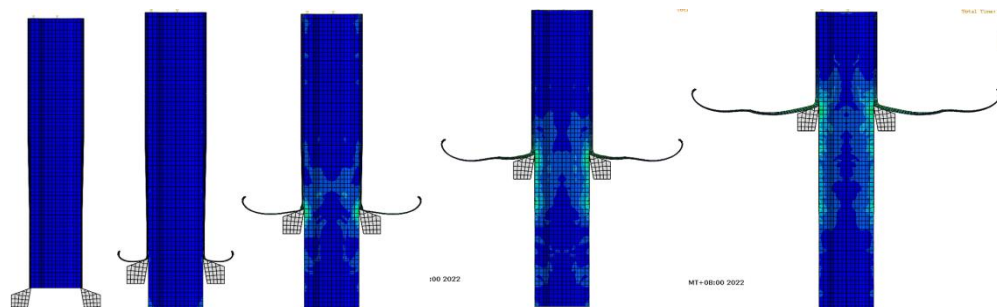

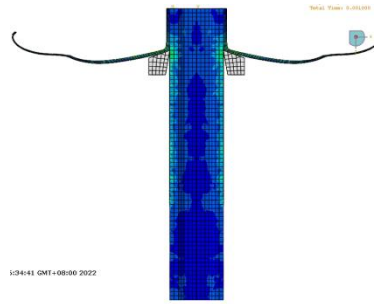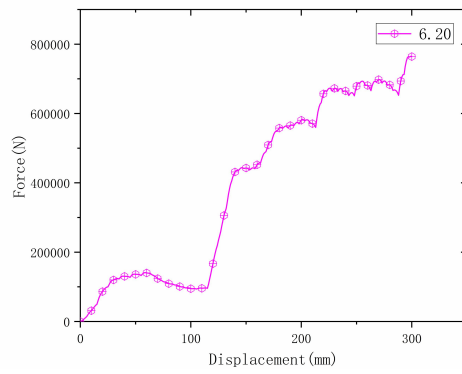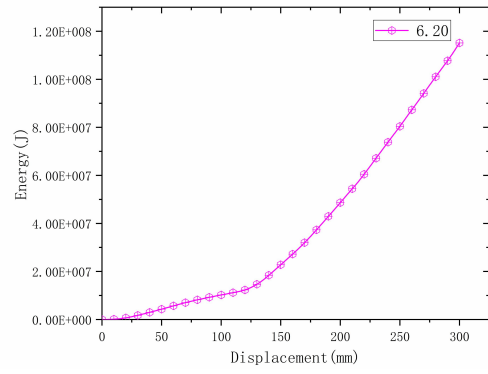

W.NO.6.20

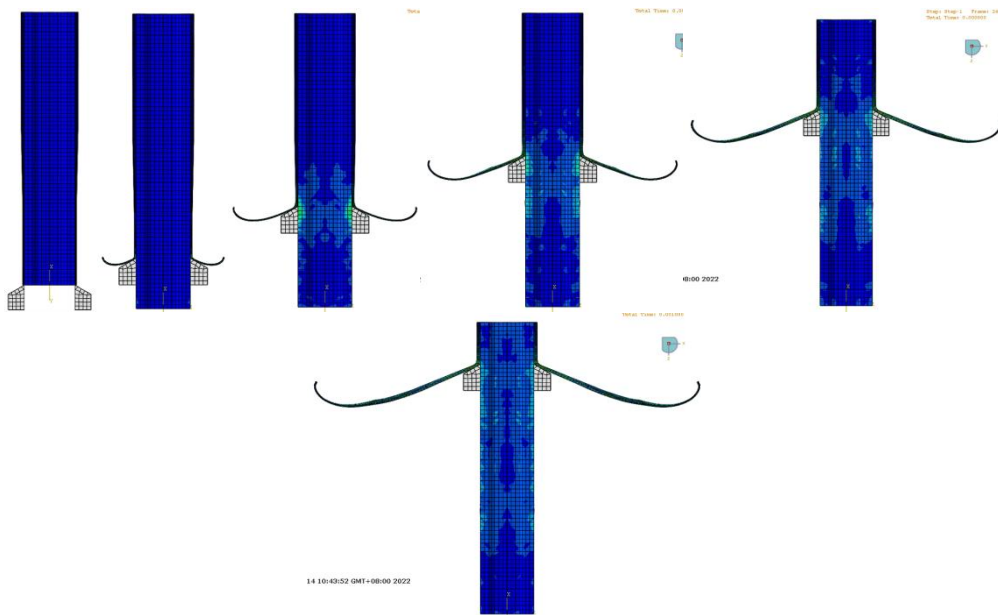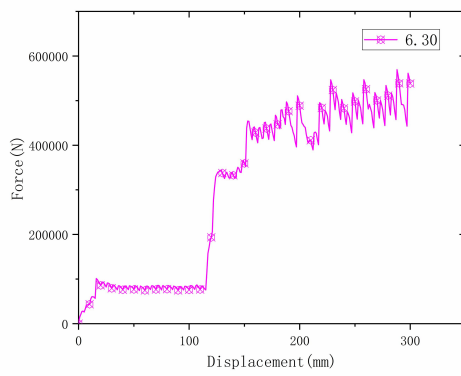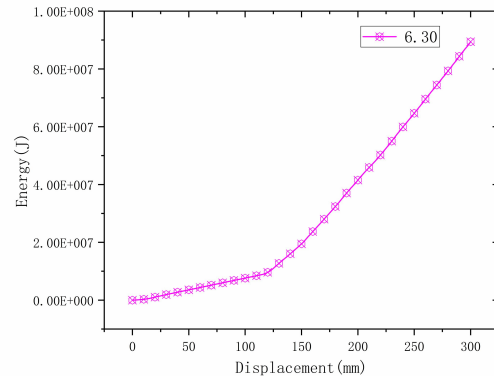

X. NO.6.30

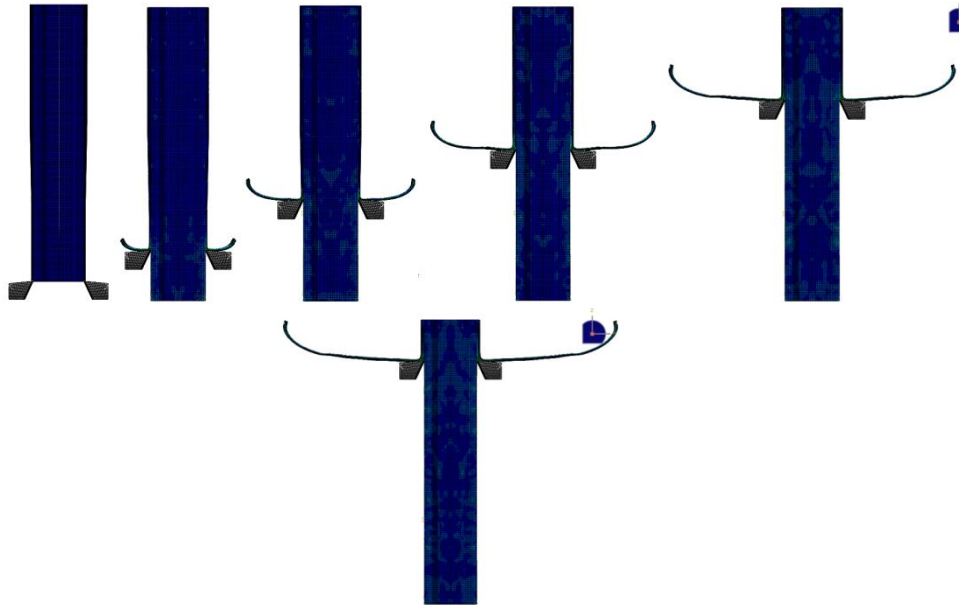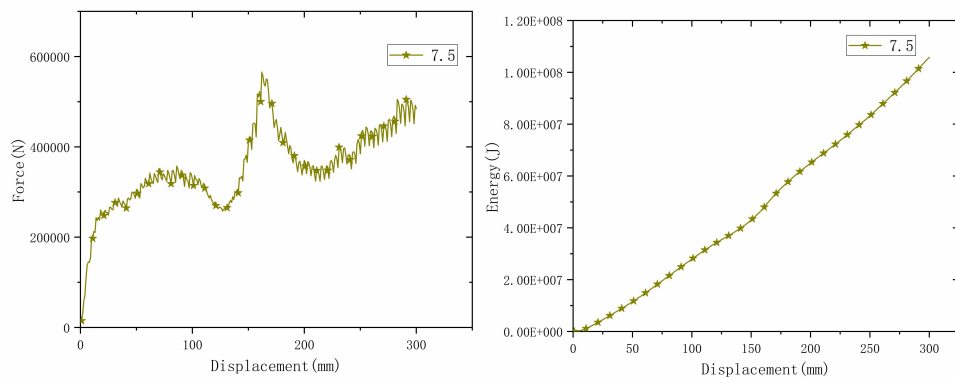

Y. NO.7.5

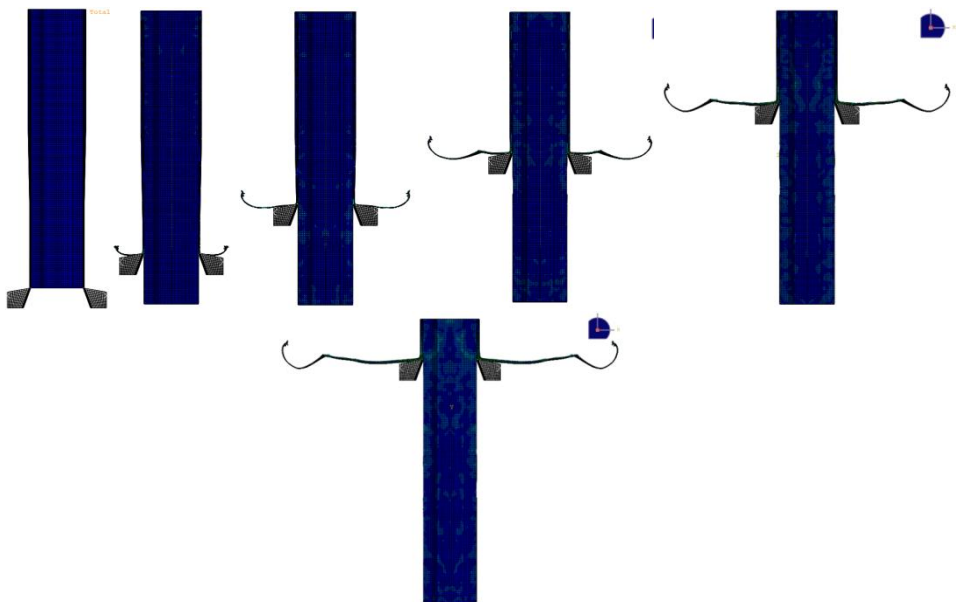

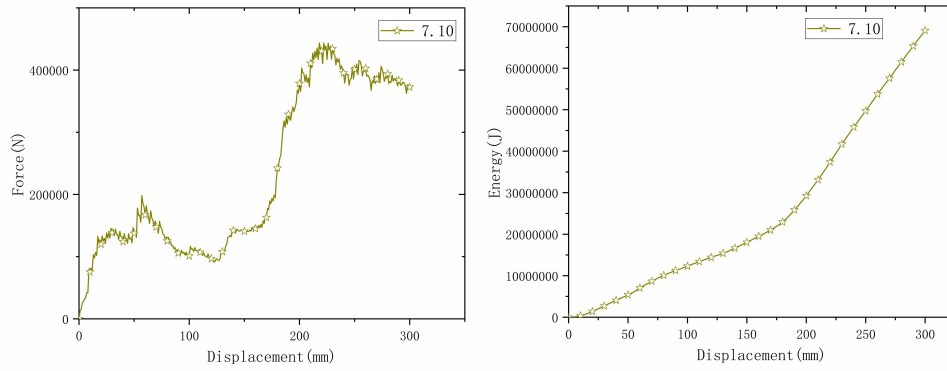

Z. NO.7.10

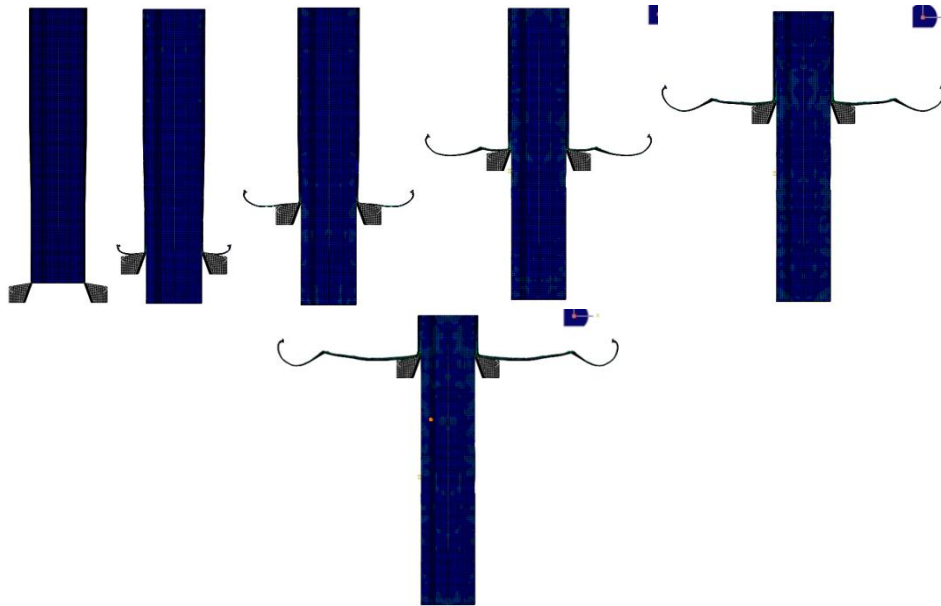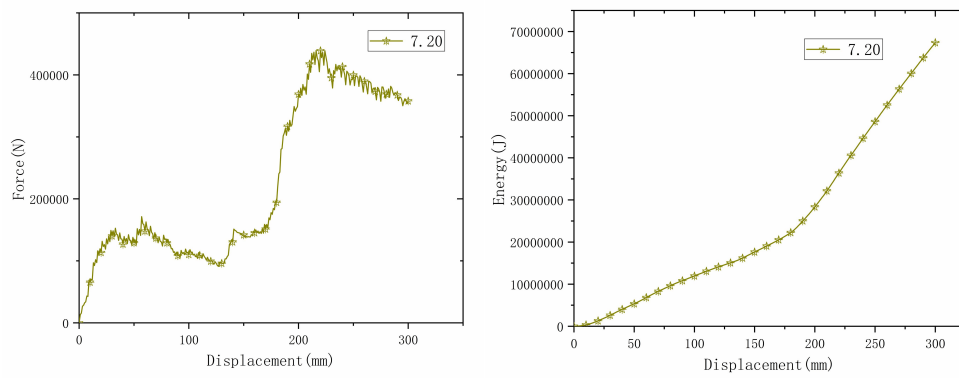

AA. NO.7.20

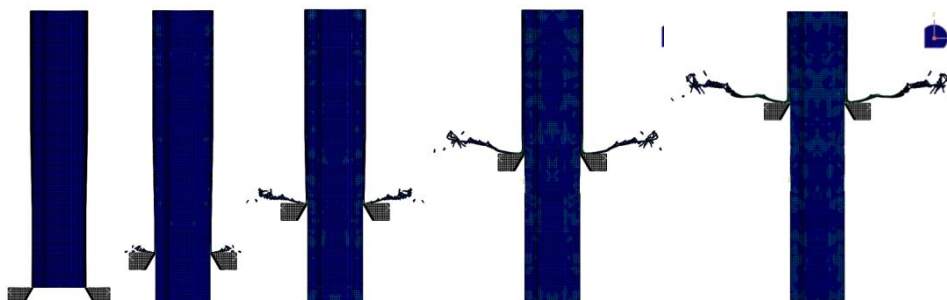

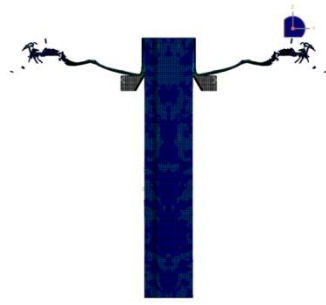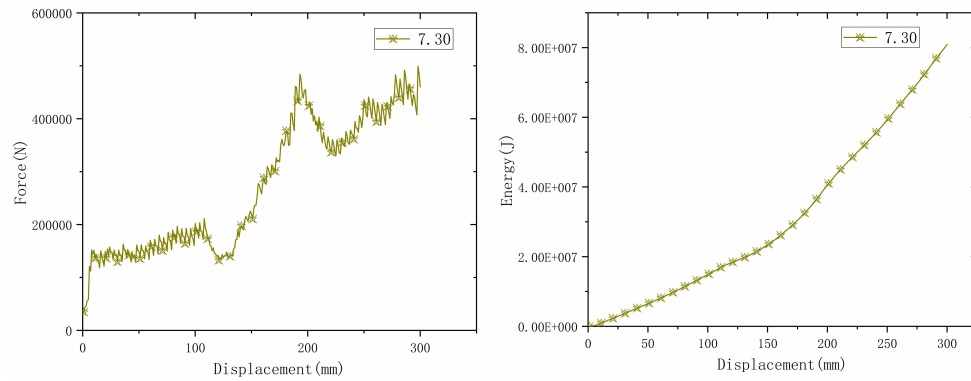

AB. NO.7.30

## Appendix B:

```

X1=[4 4 4 4 3 3 3 3 4 4 4 4 5 5 5 2 2 2 2 4 4 4 4 4 4 4];
X2=[30 30 30 30 20 20 20 20 20 20 20 20 20 20 20 20 20 20 20 20 40 40 40 40 50 50 50 50];
X3=[0.087 0.1736 0.342 0.5 0.087 0.1736 0.342 0.5 0.087 0.1736 0.342 0.5 0.087 0.1736
    0.342 0.5 0.087 0.1736 0.342 0.5 0.087 0.1736 0.342 0.5 0.087 0.1736 0.342 0.5];
z=[252.78 120.859 210.468 208.512 82.814 88.213 89.071 80.296 114.025 100.066 99.568
    77.865 146.878 157.544 110.053 149.801 123.351 83.412 42.691 50.748 355.023
    406.753 383.816 298.014 352.693 230.319 224.534 269.777];
X=[ones(28,1) log(a)' log(b)' log(c)'];
Y=log(z');
K=X\Y
C'=exp(K(1))
D=K(2)
W=K(3)
A=K(4)
C' = 0.7859
D = 0.7590
W = 1.2246
A = -0.1584

```
